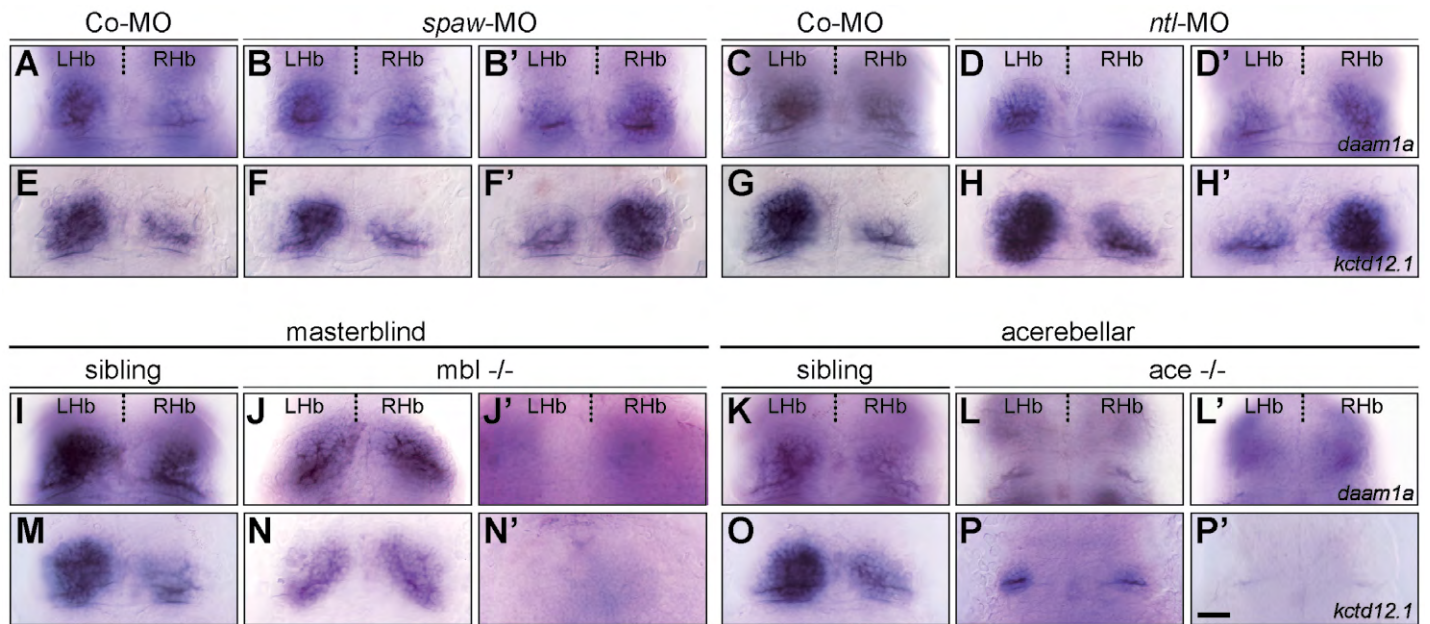

**Fig. S1. Habenuular expression of *daam1a* and *kctd12.1* in embryos with affected habenular asymmetry.** (A,C,I,K) Habenuular expression of *daam1a* in embryos injected with Co-MO (A,C) and in siblings of masterblind (*mbl*) (I) and acerebellar (*ace*) (K) mutants. (E,G,M,O) Habenuular expression of *kctd12.1* in embryos injected with Co-MO (E,G) and in siblings of *mbl* (M) and *ace* (O) mutants. (B,B',F,F') Injection of *spaw*-MO results in randomised laterality of habenular *daam1a* (B,B') and *kctd12.1* (F,F') asymmetric expression. (D,D',H,H') Injection of *ntl*-MO results in randomised laterality of habenular *daam1a* (D,D') and *kctd12.1* (H,H') asymmetric expression. (J,J',N,N') *mbl*<sup>-/-</sup> mutants show symmetric expression of *daam1a* (J) and *kctd12.1* (N), with both sides showing levels similar to the right Hb of controls; some embryos also show absence of expression (J',N'). (L,L',P,P') *ace*<sup>-/-</sup> mutants show symmetric expression of *daam1a* (L) and *kctd12.1* (P), with both sides showing levels similar to the right Hb of controls; some embryos also show absence of expression (L',P'). The relative contribution of the different phenotypes is given in Table 1. Images correspond to dorsal views of the habenular region at 96 hpf, with anterior to the top. Scale bar, 20  $\mu$ m.

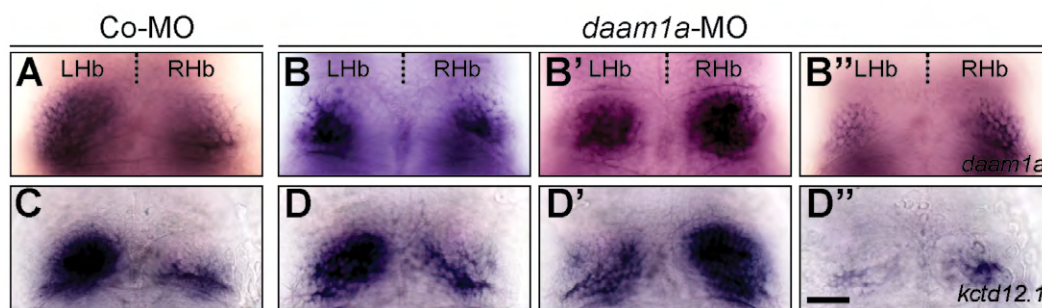

**Fig. S2. Habenuular expression of *daam1a* and *kctd12.1* after *Daam1a* knock-down.** (A,C) Expression of *daam1a* (A) and *kctd12.1* (C) in control embryos, revealing the enlarged asymmetric domain of the left Hb. (B-B'') Global knock down of *Daam1a* results in equal proportions of asymmetric left-sided (B), asymmetric right-sided (B'), and bilateral-right symmetric (B'') expression of *daam1a*. (D-D'') Global knock down of *Daam1a* leads to equal proportions of asymmetric left-sided (D), asymmetric right-sided (D'), and bilateral-right symmetric (D'') expression of *kctd12.1*. The relative contributions of the different phenotypes are given in Table 2. Images correspond to dorsal views of the habenular region at 96 hpf, with anterior to the top. Scale bar, 20  $\mu$ m.

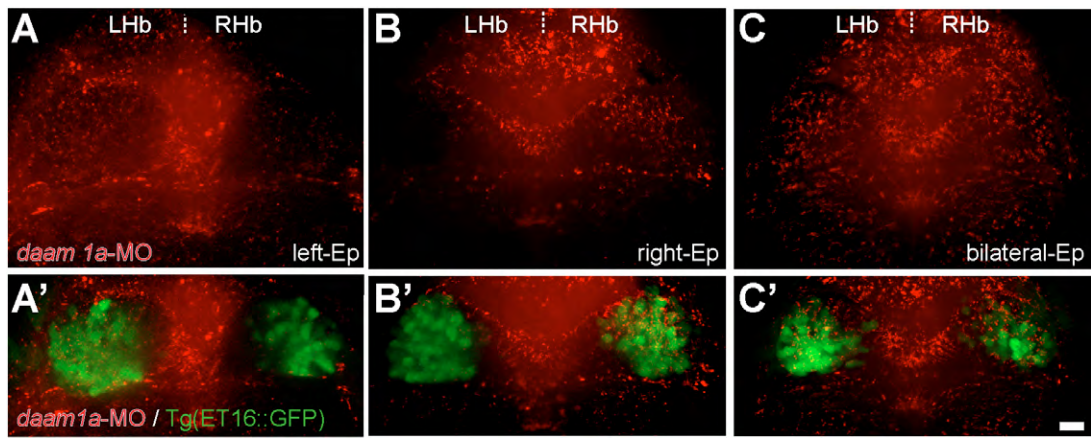

**Fig. S3. Efficiency of *daam1a*-MO local electroporation (Ep) in the habenular region.** (A-C') Distribution of lissamine-tagged *daam1a*-MO (red) locally electroporated into the left (A,A'), right (B,B') and bilateral (C,C') habenular regions (green) of Tg(ET16::GFP) embryos. Images correspond to dorsal views of maximum intensity z-stack confocal projections, with anterior to the top. Scale bar, 20  $\mu$ m.

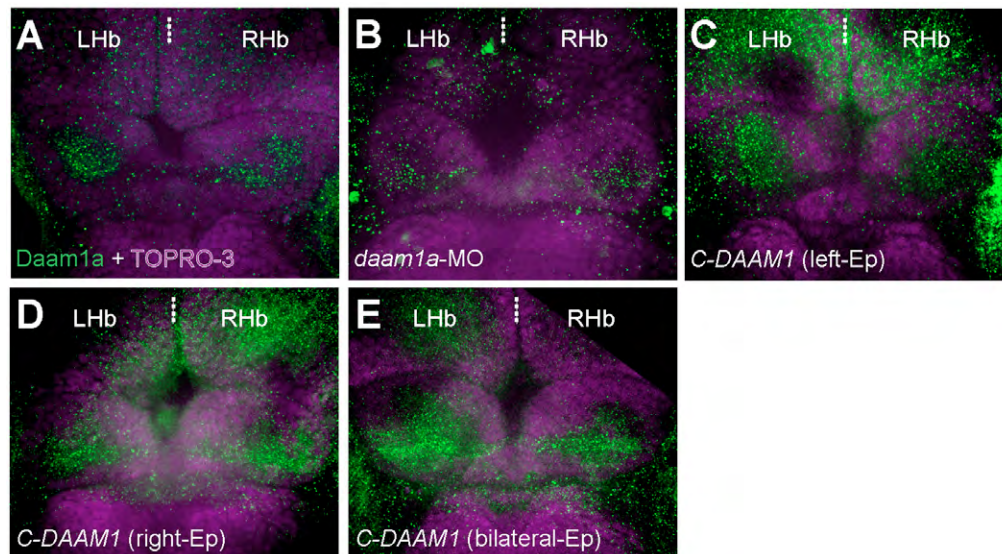

**Fig. S4. Changes in the relative levels of the endogenous *Daam1a* protein after local electroporation (Ep).** (A) The Hb of control embryos labelled through indirect immunofluorescence against *Daam1a* (green) and counter stained with TO-PRO-3 to delineate the cellular context of the Hb (purple) showed a distinct punctate expression of *Daam1a* in the habenular neuropil, larger on the left compared to the right side at 96 hpf. (B) The Hb of embryos subjected to left-sided local electroporation of *daam1a*-MO show decreased levels of *Daam1a* expression at 96 hpf, primarily on the left Hb. (C) The Hb of embryos subjected to left-sided local electroporation of *C-DAAM1* showed increased levels of *Daam1a* expression in the left Hb at 96 hpf. (D) The Hb of embryos after right-sided local electroporation of *C-DAAM1* showed increase expression levels of *Daam1a* in the right Hb at 96 hpf, compared to controls. (E) The Hb of embryos subjected to bilateral local electroporation of *C-DAAM1* showed increased levels of *Daam1a* expression in both left and right Hb at 96 hpf. Images correspond to dorsal views of maximum intensity z-stack confocal projections, with anterior to the top. Scale bar, 20  $\mu$ m.

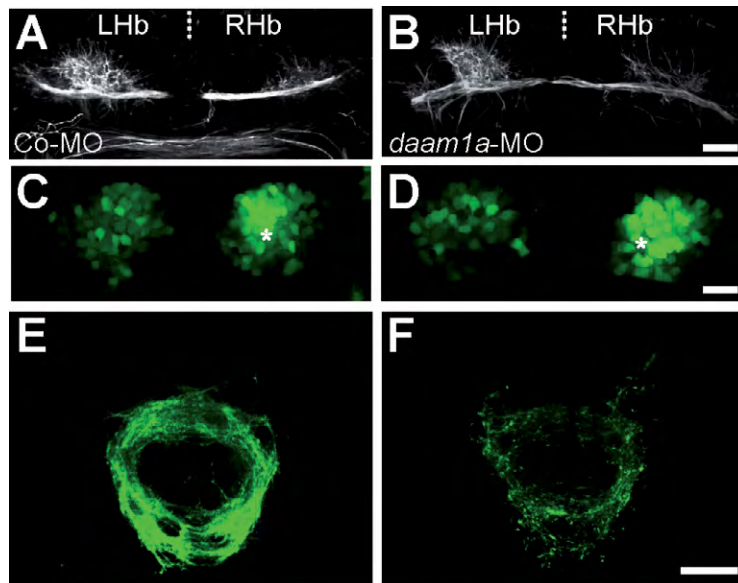

**Fig. S5. Bilateral electroporation of *daam1a*-MO induces defects in neuropil formation and IPN connectivity.** (A-F) Dorsal views of maximum intensity z-stack confocal projections of the habenular region (A-D) and IPN (E,F) in Tg(*pou4f1*-hsp70l:GFP) embryos at 4.5 dpf, with anterior to the top. The habenular neuropil was immunostained against acetylated  $\alpha$ -tubulin (A,B, white), while the soma (C,D) and efferent projections (E,F) of dorsal habenular neurons expressing *pou4f1*-hsp70l:GFP were detected in vivo (green). Each column corresponds to a different condition of local electroporation: control-MO (left) and *daam1a*-MO (right). Asterisks in C and D indicate the enlarged cellular domain of the Hb expressing the *pou4f1*-hsp70l:GFP transgene. Scale bar, 20 $\mu$ m.

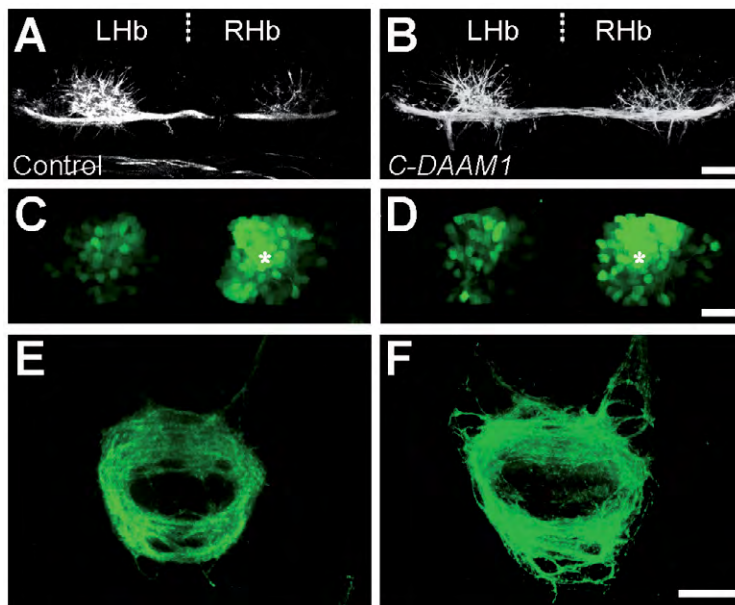

**Fig. S6. Local electroporation of *C-DAAMI* in the right habenular region induces increased axonal efferent connectivity to the IPN, without affecting habenular neuropil.** (A-F) Dorsal views of maximum intensity z-stack confocal projections of the habenular region (A-D) and IPN (E,F) in Tg(*pou4f1*-hsp70l:GFP) embryos at 4.5 dpf, with anterior to the top. The habenular neuropil was immunostained against acetylated  $\alpha$ -tubulin (A,B, white), while the soma (C,D) and efferent projections (E,F) of dorsal habenular neurons expressing *pou4f1*-hsp70l:GFP were detected in vivo (green). Each column corresponds to a different condition of local electroporation: control plasmid (left) and *pcDNA-C-DAAMI-HA* (right). Asterisks in C and D indicate the enlarged cellular domain of the Hb expressing the *pou4f1*-hsp70l:GFP transgene. Scale bar, 20 $\mu$ m.
